# Supplementary material for: Tom70-based transcriptional regulation of mitochondrial biogenesis and aging
Source: eLife. 2022 Mar 2;11:e75658. doi: 10.7554/eLife.75658 (PMC8926401; doi:10.7554/eLife.75658)
Supplement: Supplementary file 1. [file elife-75658-supp1.xlsx]

## Sheet: Figure 
REAGENT or RESOURCE	SOURCE	IDENTIFIER
BY4741	Brachmann, et al., 1988	MATa his3Δ1 leu2Δ0 met15Δ0 ura3Δ0
ZY2420	Huh et al., 2003	MATa his3Δ1 leu2Δ0 met15Δ0 ura3Δ0, MFB1-GFP-His3MX
ZY2421	Huh et al., 2003	MATa his3Δ1 leu2Δ0 met15Δ0 ura3Δ0, FMC1-GFP-His3MX
ZY2422	Huh et al., 2003	MATa his3Δ1 leu2Δ0 met15Δ0 ura3Δ0, ADH3-GFP-His3MX
ZY2424	Huh et al., 2003	MATa his3Δ1 leu2Δ0 met15Δ0 ura3Δ0, TIM16-GFP-His3MX
ZY2425	Huh et al., 2003	MATa his3Δ1 leu2Δ0 met15Δ0 ura3Δ0, TIM44-GFP-His3MX
ZY2426	Huh et al., 2003	MATa his3Δ1 leu2Δ0 met15Δ0 ura3Δ0, PUT2-GFP-His3MX
ZY2427	Huh et al., 2003	MATa his3Δ1 leu2Δ0 met15Δ0 ura3Δ0, QCR7-GFP-His3MX
ZY2428	Huh et al., 2003	MATa his3Δ1 leu2Δ0 met15Δ0 ura3Δ0, YTA10-GFP-His3MX
ZY2429	Huh et al., 2003	MATa his3Δ1 leu2Δ0 met15Δ0 ura3Δ0, TIM23-GFP-His3MX
ZY2430	Huh et al., 2003	MATa his3Δ1 leu2Δ0 met15Δ0 ura3Δ0, TIM50-GFP-His3MX
ZY2431	Huh et al., 2003	MATa his3Δ1 leu2Δ0 met15Δ0 ura3Δ0, COX5A-GFP-His3MX
ZY2433	Huh et al., 2003	MATa his3Δ1 leu2Δ0 met15Δ0 ura3Δ0, CCP1-GFP-His3MX
ZY2434	Huh et al., 2003	MATa his3Δ1 leu2Δ0 met15Δ0 ura3Δ0, ATP1-GFP-His3MX
ZY2435	Huh et al., 2003	MATa his3Δ1 leu2Δ0 met15Δ0 ura3Δ0, ATP2-GFP-His3MX
ZY2436	this study	MATa his3Δ1 leu2Δ0 met15Δ0 ura3Δ0, ACO1-GFP-KanMX
ZY2437	Huh et al., 2003	MATa his3Δ1 leu2Δ0 met15Δ0 ura3Δ0, MDL1-GFP-His3MX
ZY2438	Huh et al., 2003	MATa his3Δ1 leu2Δ0 met15Δ0 ura3Δ0, CIT1-GFP-His3MX
ZY2439	Huh et al., 2003	MATa his3Δ1 leu2Δ0 met15Δ0 ura3Δ0, ATP25-GFP-His3MX
ZY2440	Huh et al., 2003	MATa his3Δ1 leu2Δ0 met15Δ0 ura3Δ0, YFH1-GFP-His3MX
ZY2441	Huh et al., 2003	MATa his3Δ1 leu2Δ0 met15Δ0 ura3Δ0, LEU9-GFP-His3MX
ZY2444	Huh et al., 2003	MATa his3Δ1 leu2Δ0 met15Δ0 ura3Δ0, TOM7-GFP-His3MX
ZY2445	Huh et al., 2003	MATa his3Δ1 leu2Δ0 met15Δ0 ura3Δ0, TOM20-GFP-His3MX
ZY2446	Huh et al., 2003	MATa his3Δ1 leu2Δ0 met15Δ0 ura3Δ0, TOM22-GFP-His3MX
ZY2447	Huh et al., 2003	MATa his3Δ1 leu2Δ0 met15Δ0 ura3Δ0, TOM71-GFP-His3MX
ZY2458	this study	MATa his3Δ1 leu2Δ0 met15Δ0 ura3Δ0, MFB1-GFP-His3MX, pBY011-pGAL-TOM70
ZY2459	this study	MATa his3Δ1 leu2Δ0 met15Δ0 ura3Δ0, FMC1-GFP-His3MX, pBY011-pGAL-TOM70
zy2460	this study	MATa his3Δ1 leu2Δ0 met15Δ0 ura3Δ0, ADH3-GFP-His3MX, pBY011-pGAL-TOM70
ZY2462	this study	MATa his3Δ1 leu2Δ0 met15Δ0 ura3Δ0, TIM16-GFP-His3MX, pBY011-pGAL-TOM70
ZY2463	this study	MATa his3Δ1 leu2Δ0 met15Δ0 ura3Δ0, TIM44-GFP-His3MX, pBY011-pGAL-TOM70
ZY2464	this study	MATa his3Δ1 leu2Δ0 met15Δ0 ura3Δ0, PUT2-GFP-His3MX, pBY011-pGAL-TOM70
ZY2465	this study	MATa his3Δ1 leu2Δ0 met15Δ0 ura3Δ0, QCR7-GFP-His3MX, pBY011-pGAL-TOM70
ZY2466	this study	MATa his3Δ1 leu2Δ0 met15Δ0 ura3Δ0, YTA10-GFP-His3MX, pBY011-pGAL-TOM70
ZY2467	this study	MATa his3Δ1 leu2Δ0 met15Δ0 ura3Δ0, TIM23-GFP-His3MX, pBY011-pGAL-TOM70
ZY2468	this study	MATa his3Δ1 leu2Δ0 met15Δ0 ura3Δ0, TIM50-GFP-His3MX, pBY011-pGAL-TOM70
ZY2469	this study	MATa his3Δ1 leu2Δ0 met15Δ0 ura3Δ0, COX5A-GFP-His3MX, pBY011-pGAL-TOM70
ZY2471	this study	MATa his3Δ1 leu2Δ0 met15Δ0 ura3Δ0, CCP1-GFP-His3MX, pBY011-pGAL-TOM70
ZY2472	this study	MATa his3Δ1 leu2Δ0 met15Δ0 ura3Δ0, ATP1-GFP-His3MX, pBY011-pGAL-TOM70
ZY2473	this study	MATa his3Δ1 leu2Δ0 met15Δ0 ura3Δ0, ATP2-GFP-His3MX, pBY011-pGAL-TOM70
ZY2474	this study	MATa his3Δ1 leu2Δ0 met15Δ0 ura3Δ0, ACO1-GFP-KanMX, pBY011-pGAL-TOM70
ZY2475	this study	MATa his3Δ1 leu2Δ0 met15Δ0 ura3Δ0, MDL1-GFP-His3MX, pBY011-pGAL-TOM70
ZY2476	this study	MATa his3Δ1 leu2Δ0 met15Δ0 ura3Δ0, CIT1-GFP-His3MX, pBY011-pGAL-TOM70
ZY2477	this study	MATa his3Δ1 leu2Δ0 met15Δ0 ura3Δ0, ATP25-GFP-His3MX, pBY011-pGAL-TOM70
ZY2478	this study	MATa his3Δ1 leu2Δ0 met15Δ0 ura3Δ0, YFH1-GFP-His3MX, pBY011-pGAL-TOM70
ZY2479	this study	MATa his3Δ1 leu2Δ0 met15Δ0 ura3Δ0, LEU9-GFP-His3MX, pBY011-pGAL-TOM70
ZY2482	this study	MATa his3Δ1 leu2Δ0 met15Δ0 ura3Δ0, TOM7-GFP-His3MX, pBY011-pGAL-TOM70
ZY2483	this study	MATa his3Δ1 leu2Δ0 met15Δ0 ura3Δ0, TOM20-GFP-His3MX, pBY011-pGAL-TOM70
ZY2484	this study	MATa his3Δ1 leu2Δ0 met15Δ0 ura3Δ0, TOM22-GFP-His3MX, pBY011-pGAL-TOM70
ZY2485	this study	MATa his3Δ1 leu2Δ0 met15Δ0 ura3Δ0, TOM71-GFP-His3MX, pBY011-pGAL-TOM70
ZY3459	this study	MATa his3Δ1 leu2Δ0 met15Δ0 ura3Δ0, Tom22-GFP-HisMX; pBY011-pGal-Tom5-UraMX
ZY3460	this study	MATa his3Δ1 leu2Δ0 met15Δ0 ura3Δ0, Tom22-GFP-HisMX; pBY011-pGal-Tom6-UraMX
ZY3461	this study	MATa his3Δ1 leu2Δ0 met15Δ0 ura3Δ0, Tom22-GFP-HisMX; pBY011-pGal-Tom7-UraMX
ZY3462	this study	MATa his3Δ1 leu2Δ0 met15Δ0 ura3Δ0, Tom22-GFP-HisMX; pBY011-pGal-Tom20-UraMX
ZY3463	this study	MATa his3Δ1 leu2Δ0 met15Δ0 ura3Δ0, Tom22-GFP-HisMX; pBY011-pGal-Tom22-UraMX
ZY3464	this study	MATa his3Δ1 leu2Δ0 met15Δ0 ura3Δ0, Tom22-GFP-HisMX; pBY011-pGal-Tom40-UraMX
ZY3465	this study	MATa his3Δ1 leu2Δ0 met15Δ0 ura3Δ0, Tom22-GFP-HisMX; pBY011-pGal-Tom70-UraMX
ZY3466	this study	MATa his3Δ1 leu2Δ0 met15Δ0 ura3Δ0, Cox5A-GFP-HisMX; pBY011-pGal-Tom5-UraMX
ZY3467	this study	MATa his3Δ1 leu2Δ0 met15Δ0 ura3Δ0, Cox5A-GFP-HisMX; pBY011-pGal-Tom6-UraMX
ZY3468	this study	MATa his3Δ1 leu2Δ0 met15Δ0 ura3Δ0, Cox5A-GFP-HisMX; pBY011-pGal-Tom7-UraMX
ZY3469	this study	MATa his3Δ1 leu2Δ0 met15Δ0 ura3Δ0, Cox5A-GFP-HisMX; pBY011-pGal-Tom20-UraMX
ZY3470	this study	MATa his3Δ1 leu2Δ0 met15Δ0 ura3Δ0, Cox5A-GFP-HisMX; pBY011-pGal-Tom22-UraMX
ZY3471	this study	MATa his3Δ1 leu2Δ0 met15Δ0 ura3Δ0, Cox5A-GFP-HisMX; pBY011-pGal-Tom40-UraMX
ZY3472	this study	MATa his3Δ1 leu2Δ0 met15Δ0 ura3Δ0, Cox5A-GFP-HisMX; pBY011-pGal-Tom70-UraMX
ZY3473	this study	MATa his3Δ1 leu2Δ0 met15Δ0 ura3Δ0, CCP1-GFP-HisMX; pBY011-pGal-Tom5-UraMX
ZY3474	this study	MATa his3Δ1 leu2Δ0 met15Δ0 ura3Δ0, CCP1-GFP-HisMX; pBY011-pGal-Tom6-UraMX
ZY3475	this study	MATa his3Δ1 leu2Δ0 met15Δ0 ura3Δ0, CCP1-GFP-HisMX; pBY011-pGal-Tom7-UraMX
ZY3476	this study	MATa his3Δ1 leu2Δ0 met15Δ0 ura3Δ0, CCP1-GFP-HisMX; pBY011-pGal-Tom20-UraMX
ZY3477	this study	MATa his3Δ1 leu2Δ0 met15Δ0 ura3Δ0, CCP1-GFP-HisMX; pBY011-pGal-Tom22-UraMX
ZY3478	this study	MATa his3Δ1 leu2Δ0 met15Δ0 ura3Δ0, CCP1-GFP-HisMX; pBY011-pGal-Tom40-UraMX
ZY3479	this study	MATa his3Δ1 leu2Δ0 met15Δ0 ura3Δ0, CCP1-GFP-HisMX; pBY011-pGal-Tom70-UraMX
ZY3480	this study	MATa his3Δ1 leu2Δ0 met15Δ0 ura3Δ0, Leu9-GFP-HisMX; pBY011-pGal-Tom5-UraMX
ZY3481	this study	MATa his3Δ1 leu2Δ0 met15Δ0 ura3Δ0, Leu9-GFP-HisMX; pBY011-pGal-Tom6-UraMX
ZY3482	this study	MATa his3Δ1 leu2Δ0 met15Δ0 ura3Δ0, Leu9-GFP-HisMX; pBY011-pGal-Tom7-UraMX
ZY3483	this study	MATa his3Δ1 leu2Δ0 met15Δ0 ura3Δ0, Leu9-GFP-HisMX; pBY011-pGal-Tom20-UraMX
ZY3484	this study	MATa his3Δ1 leu2Δ0 met15Δ0 ura3Δ0, Leu9-GFP-HisMX; pBY011-pGal-Tom22-UraMX
ZY3485	this study	MATa his3Δ1 leu2Δ0 met15Δ0 ura3Δ0, Leu9-GFP-HisMX; pBY011-pGal-Tom40-UraMX
ZY3486	this study	MATa his3Δ1 leu2Δ0 met15Δ0 ura3Δ0, Leu9-GFP-HisMX; pBY011-pGal-Tom70-UraMX
ZY3487	this study	MATa his3Δ1 leu2Δ0 met15Δ0 ura3Δ0, Tom22-GFP-HisMX; pBY011-pGal-Hap4-UraMX
ZY3488	this study	MATa his3Δ1 leu2Δ0 met15Δ0 ura3Δ0, Cox5A-GFP-HisMX; pBY011-pGal-Hap4-UraMX
ZY3489	this study	MATa his3Δ1 leu2Δ0 met15Δ0 ura3Δ0, CCP1-GFP-HisMX; pBY011-pGal-Hap4-UraMX
ZY3490	this study	MATa his3Δ1 leu2Δ0 met15Δ0 ura3Δ0, Leu9-GFP-HisMX; pBY011-pGal-Hap4-UraMX
ZY1439	this study	MATa his3Δ1 leu2Δ0 met15Δ0 ura3Δ0, TOM70-GFP-His3MX, TRP1::p404-NatMX-pSu9-mCherry;
ZY1463	this study	MATa his3Δ1 leu2Δ0 met15Δ0 ura3Δ0, TOM70-GFP-His3MX, TRP1::p404-NatMX-pSu9-mCherry; TRP1::p404-hphMX-pGAL-TOM70 38TEV
ZY2347	this study	MATa his3Δ1 leu2Δ0 met15Δ0 ura3Δ0, TRP1::p404-NatMX-pSu9-mCherry;
ZY2974	this study	MATa his3Δ1 leu2Δ0 met15Δ0 ura3Δ0, TRP1::p404-NatMX-pSu9-mCherry; TRP1::p404-His3MX-pGAL-TOM70 cytosolicdomain
ZY869	this study	MATa his3Δ1 leu2Δ0 met15Δ0 ura3Δ0, tom70∆-KanMX, tom70∆::pRS306-pTOM70-TOM70 38TEV-GFP
ZY875	this study	MATa his3Δ1 leu2Δ0 met15Δ0 ura3Δ0, tom70∆-KanMX, tom70∆::pRS306-pTOM70-TOM70 38TEV-GFP, TRP1::p404-NatMX-GAL-TOM20tm-TEV
ZY3686	this study	MATa his3Δ1 leu2Δ0 met15Δ0 ura3Δ0, Hsp104-GFP-HisMX, TRP1::p404TDH3-NatMX-pOLI-HcRed; rho-0
ZY3687	this study	MATa his3Δ1 leu2Δ0 met15Δ0 ura3Δ0, Hsp104-GFP-HisMX, TRP1::p404TDH3-NatMX-pOLI-HcRed; TRP1::p404-HisMX-HphMX-pGAL-Tom70 38TEV; rho-0
ZY930	this study	MATa his3Δ1 leu2Δ0 met15Δ0 ura3Δ0, HSP104-GFP-His3MX, ∆tom70-KanMX, ∆tom70::pRS306-UraMX-KanMX- pTom70-Tom70 38TEV, TRP1::p404-NatMX-pGAL-Tom20tm-TEV
ZY914	this study	MATa his3Δ1 leu2Δ0 met15Δ0 ura3Δ0, HSP104-GFP-His3MX, ∆tom70-KanMX, ∆tom70::pRS306-UraMX-KanMX- pTom70-Tom70 38TEV
ZY2448	Huh et al., 2003	MATa his3Δ1 leu2Δ0 met15Δ0 ura3Δ0,RTG1-GFP-His3MX
ZY2450	Huh et al., 2003	MATa his3Δ1 leu2Δ0 met15Δ0 ura3Δ0,RTG3-GFP-His3MX
ZY2490	this study	MATa his3Δ1 leu2Δ0 met15Δ0 ura3Δ0,RTG1-GFP-His3MX, TRP1::p404-NatMX-pGAL-TOM70-mCherry
ZY2491	this study	MATa his3Δ1 leu2Δ0 met15Δ0 ura3Δ0,RTG2-GFP-His3MX, TRP1::p404-NatMX-pGAL-TOM70-mCherry
ZY2417	this study	MATa his3Δ1 leu2Δ0 met15Δ0 ura3Δ0,rtg3∆-KanMX
ZY3449	this study	MATa his3Δ1 leu2Δ0 met15Δ0 ura3Δ0, TRP1::p404-His3MX-pGAL-TOM70 38TEV
ZY3450	this study	MATa his3Δ1 leu2Δ0 met15Δ0 ura3Δ0, TRP1::p404-His3MX-pGAL-TOM70 38TEV,rtg3∆-KanMX
ZY2976	this study	MATa his3Δ1 leu2Δ0 met15Δ0 ura3Δ0, ADH3-GFP-His3MX, pRS316
ZY2977	this study	MATa his3Δ1 leu2Δ0 met15Δ0 ura3Δ0, ADH3-GFP-His3MX, pBY011-pGAL-HAP2
ZY2978	this study	MATa his3Δ1 leu2Δ0 met15Δ0 ura3Δ0, ADH3-GFP-His3MX, pBY011-pGAL-HAP3
ZY2979	this study	MATa his3Δ1 leu2Δ0 met15Δ0 ura3Δ0, ADH3-GFP-His3MX, pBY011-pGAL-HAP4
ZY2980	this study	MATa his3Δ1 leu2Δ0 met15Δ0 ura3Δ0, ADH3-GFP-His3MX, pBY011-pGAL-HAP5
ZY2981	this study	MATa his3Δ1 leu2Δ0 met15Δ0 ura3Δ0, ADH3-GFP-His3MX, pBY011-pGAL-NDT80
ZY2982	this study	MATa his3Δ1 leu2Δ0 met15Δ0 ura3Δ0, ADH3-GFP-His3MX, pBY011-pGAL-FKH1
ZY2983	this study	MATa his3Δ1 leu2Δ0 met15Δ0 ura3Δ0, ADH3-GFP-His3MX, pBY011-pGAL-FKH2
ZY2984	this study	MATa his3Δ1 leu2Δ0 met15Δ0 ura3Δ0, ADH3-GFP-His3MX, pBY011-pGAL-GCR1
ZY2987	this study	MATa his3Δ1 leu2Δ0 met15Δ0 ura3Δ0, ADH3-GFP-His3MX, pBY011-pGAL-RTG1
ZY2989	this study	MATa his3Δ1 leu2Δ0 met15Δ0 ura3Δ0, QCR7-GFP-His3MX, pRS316
ZY2990	this study	MATa his3Δ1 leu2Δ0 met15Δ0 ura3Δ0, QCR7-GFP-His3MX, pBY011-pGAL-HAP2
ZY2991	this study	MATa his3Δ1 leu2Δ0 met15Δ0 ura3Δ0, QCR7-GFP-His3MX, pBY011-pGAL-HAP3
ZY2992	this study	MATa his3Δ1 leu2Δ0 met15Δ0 ura3Δ0, QCR7-GFP-His3MX, pBY011-pGAL-HAP4
ZY2993	this study	MATa his3Δ1 leu2Δ0 met15Δ0 ura3Δ0, QCR7-GFP-His3MX, pBY011-pGAL-HAP5
ZY2994	this study	MATa his3Δ1 leu2Δ0 met15Δ0 ura3Δ0, QCR7-GFP-His3MX, pBY011-pGAL-NDT80
ZY2995	this study	MATa his3Δ1 leu2Δ0 met15Δ0 ura3Δ0, QCR7-GFP-His3MX, pBY011-pGAL-FKH1
ZY2996	this study	MATa his3Δ1 leu2Δ0 met15Δ0 ura3Δ0, QCR7-GFP-His3MX, pBY011-pGAL-FKH2
ZY2997	this study	MATa his3Δ1 leu2Δ0 met15Δ0 ura3Δ0, QCR7-GFP-His3MX, pBY011-pGAL-GCR1
ZY3000	this study	MATa his3Δ1 leu2Δ0 met15Δ0 ura3Δ0, QCR7-GFP-His3MX, pBY011-pGAL-RTG1
ZY3002	this study	MATa his3Δ1 leu2Δ0 met15Δ0 ura3Δ0, TIM44-GFP-His3MX, pRS316
ZY3003	this study	MATa his3Δ1 leu2Δ0 met15Δ0 ura3Δ0, TIM44-GFP-His3MX, pBY011-pGAL-HAP2
ZY3004	this study	MATa his3Δ1 leu2Δ0 met15Δ0 ura3Δ0, TIM44-GFP-His3MX, pBY011-pGAL-HAP3
ZY3005	this study	MATa his3Δ1 leu2Δ0 met15Δ0 ura3Δ0, TIM44-GFP-His3MX, pBY011-pGAL-HAP4
ZY3006	this study	MATa his3Δ1 leu2Δ0 met15Δ0 ura3Δ0, TIM44-GFP-His3MX, pBY011-pGAL-HAP5
ZY3007	this study	MATa his3Δ1 leu2Δ0 met15Δ0 ura3Δ0, TIM44-GFP-His3MX, pBY011-pGAL-NDT80
ZY3008	this study	MATa his3Δ1 leu2Δ0 met15Δ0 ura3Δ0, TIM44-GFP-His3MX, pBY011-pGAL-FKH1
ZY3009	this study	MATa his3Δ1 leu2Δ0 met15Δ0 ura3Δ0, TIM44-GFP-His3MX, pBY011-pGAL-FKH2
ZY3010	this study	MATa his3Δ1 leu2Δ0 met15Δ0 ura3Δ0, TIM44-GFP-His3MX, pBY011-pGAL-GCR1
ZY3013	this study	MATa his3Δ1 leu2Δ0 met15Δ0 ura3Δ0, TIM44-GFP-His3MX, pBY011-pGAL-RTG1
ZY3015	this study	MATa his3Δ1 leu2Δ0 met15Δ0 ura3Δ0, ADH3-GFP-KanMX,
ZY3015-1	this study	MATa his3Δ1 leu2Δ0 met15Δ0 ura3Δ0, ADH3-GFP-KanMX, TRP1::p404-His3MX-pGAL-PDR3
ZY3015-2	this study	MATa his3Δ1 leu2Δ0 met15Δ0 ura3Δ0, ADH3-GFP-KanMX, TRP1::p404-His3MX-pGAL-HAP4
ZY3015-3	this study	MATa his3Δ1 leu2Δ0 met15Δ0 ura3Δ0, ADH3-GFP-KanMX, TRP1::p404-His3MX-pGAL-BAS1
ZY3015-4	this study	MATa his3Δ1 leu2Δ0 met15Δ0 ura3Δ0, ADH3-GFP-KanMX, TRP1::p404-His3MX-pGAL-MET31
ZY3015-5	this study	MATa his3Δ1 leu2Δ0 met15Δ0 ura3Δ0, ADH3-GFP-KanMX, TRP1::p404-His3MX-pGAL-MSN2
ZY3015-6	this study	MATa his3Δ1 leu2Δ0 met15Δ0 ura3Δ0, ADH3-GFP-KanMX, TRP1::p404-His3MX-pGAL-MSN4
ZY3015-7	this study	MATa his3Δ1 leu2Δ0 met15Δ0 ura3Δ0, ADH3-GFP-KanMX, TRP1::p404-His3MX-pGAL-CCR4
ZY3015-8	this study	MATa his3Δ1 leu2Δ0 met15Δ0 ura3Δ0, ADH3-GFP-KanMX, TRP1::p404-His3MX-pGAL-RTG1
ZY3015-9	this study	MATa his3Δ1 leu2Δ0 met15Δ0 ura3Δ0, ADH3-GFP-KanMX, TRP1::p404-His3MX-pGAL-CBF1
ZY3015-11	this study	MATa his3Δ1 leu2Δ0 met15Δ0 ura3Δ0, ADH3-GFP-KanMX, TRP1::p404-His3MX-pGAL-ABF2
ZY3015-12	this study	MATa his3Δ1 leu2Δ0 met15Δ0 ura3Δ0, ADH3-GFP-KanMX, TRP1::p404-His3MX-pGAL-GLN3
ZY3015-13	this study	MATa his3Δ1 leu2Δ0 met15Δ0 ura3Δ0, ADH3-GFP-KanMX, TRP1::p404-His3MX-pGAL-PHO2
ZY3015-14	this study	MATa his3Δ1 leu2Δ0 met15Δ0 ura3Δ0, ADH3-GFP-KanMX, TRP1::p404-His3MX-pGAL-SOK2
ZY3015-16	this study	MATa his3Δ1 leu2Δ0 met15Δ0 ura3Δ0, ADH3-GFP-KanMX, TRP1::p404-His3MX-pGAL-SNF1
ZY4871	this study	MATa his3Δ1 leu2Δ0 met15Δ0 ura3Δ0, ADH3-GFP-KanMX, TRP1::p404-His3MX-pGAL-MTF1
ZY4872	this study	MATa his3Δ1 leu2Δ0 met15Δ0 ura3Δ0, ADH3-GFP-KanMX, pBY011-pGAL-RPO41
ZY4873	this study	MATa his3Δ1 leu2Δ0 met15Δ0 ura3Δ0, ADH3-GFP-KanMX, TRP1::p404-His3MX-pGAL-MTF1, pBY011-pGAL-RPO41
ZY3016	this study	MATa his3Δ1 leu2Δ0 met15Δ0 ura3Δ0, QCR7-GFP-KanMX,
ZY3016-1	this study	MATa his3Δ1 leu2Δ0 met15Δ0 ura3Δ0, QCR7-GFP-KanMX, TRP1::p404-His3MX-pGAL-PDR3
ZY3016-2	this study	MATa his3Δ1 leu2Δ0 met15Δ0 ura3Δ0, QCR7-GFP-KanMX, TRP1::p404-His3MX-pGAL-HAP4
ZY3016-3	this study	MATa his3Δ1 leu2Δ0 met15Δ0 ura3Δ0, QCR7-GFP-KanMX, TRP1::p404-His3MX-pGAL-BAS1
ZY3016-4	this study	MATa his3Δ1 leu2Δ0 met15Δ0 ura3Δ0, QCR7-GFP-KanMX, TRP1::p404-His3MX-pGAL-MET31
ZY3016-5	this study	MATa his3Δ1 leu2Δ0 met15Δ0 ura3Δ0, QCR7-GFP-KanMX, TRP1::p404-His3MX-pGAL-MSN2
ZY3016-6	this study	MATa his3Δ1 leu2Δ0 met15Δ0 ura3Δ0, QCR7-GFP-KanMX, TRP1::p404-His3MX-pGAL-MSN4
ZY3016-7	this study	MATa his3Δ1 leu2Δ0 met15Δ0 ura3Δ0, QCR7-GFP-KanMX, TRP1::p404-His3MX-pGAL-CCR4
ZY3016-8	this study	MATa his3Δ1 leu2Δ0 met15Δ0 ura3Δ0, QCR7-GFP-KanMX, TRP1::p404-His3MX-pGAL-RTG1
ZY3016-9	this study	MATa his3Δ1 leu2Δ0 met15Δ0 ura3Δ0, QCR7-GFP-KanMX, TRP1::p404-His3MX-pGAL-CBF1
ZY3016-11	this study	MATa his3Δ1 leu2Δ0 met15Δ0 ura3Δ0, QCR7-GFP-KanMX, TRP1::p404-His3MX-pGAL-ABF2
ZY3016-12	this study	MATa his3Δ1 leu2Δ0 met15Δ0 ura3Δ0, QCR7-GFP-KanMX, TRP1::p404-His3MX-pGAL-GLN3
ZY3016-13	this study	MATa his3Δ1 leu2Δ0 met15Δ0 ura3Δ0, QCR7-GFP-KanMX, TRP1::p404-His3MX-pGAL-PHO2
ZY3016-14	this study	MATa his3Δ1 leu2Δ0 met15Δ0 ura3Δ0, QCR7-GFP-KanMX, TRP1::p404-His3MX-pGAL-SOK2
ZY3016-16	this study	MATa his3Δ1 leu2Δ0 met15Δ0 ura3Δ0, QCR7-GFP-KanMX, TRP1::p404-His3MX-pGAL-SNF1
ZY4874	this study	MATa his3Δ1 leu2Δ0 met15Δ0 ura3Δ0, QCR7-GFP-KanMX, TRP1::p404-His3MX-pGAL-MTF1
ZY4875	this study	MATa his3Δ1 leu2Δ0 met15Δ0 ura3Δ0, QCR7-GFP-KanMX, pBY011-pGAL-RPO41
ZY4876	this study	MATa his3Δ1 leu2Δ0 met15Δ0 ura3Δ0, QCR7-GFP-KanMX, TRP1::p404-His3MX-pGAL-MTF1, pBY011-pGAL-RPO41
ZY3017	this study	MATa his3Δ1 leu2Δ0 met15Δ0 ura3Δ0, TIM44-GFP-KanMX,
ZY3017-1	this study	MATa his3Δ1 leu2Δ0 met15Δ0 ura3Δ0, TIM44-GFP-KanMX, TRP1::p404-His3MX-pGAL-PDR3
ZY3017-2	this study	MATa his3Δ1 leu2Δ0 met15Δ0 ura3Δ0, TIM44-GFP-KanMX, TRP1::p404-His3MX-pGAL-HAP4
ZY3017-3	this study	MATa his3Δ1 leu2Δ0 met15Δ0 ura3Δ0, TIM44-GFP-KanMX, TRP1::p404-His3MX-pGAL-BAS1
ZY3017-4	this study	MATa his3Δ1 leu2Δ0 met15Δ0 ura3Δ0, TIM44-GFP-KanMX, TRP1::p404-His3MX-pGAL-MET31
ZY3017-5	this study	MATa his3Δ1 leu2Δ0 met15Δ0 ura3Δ0, TIM44-GFP-KanMX, TRP1::p404-His3MX-pGAL-MSN2
ZY3017-6	this study	MATa his3Δ1 leu2Δ0 met15Δ0 ura3Δ0, TIM44-GFP-KanMX, TRP1::p404-His3MX-pGAL-MSN4
ZY3017-7	this study	MATa his3Δ1 leu2Δ0 met15Δ0 ura3Δ0, TIM44-GFP-KanMX, TRP1::p404-His3MX-pGAL-CCR4
ZY3017-8	this study	MATa his3Δ1 leu2Δ0 met15Δ0 ura3Δ0, TIM44-GFP-KanMX, TRP1::p404-His3MX-pGAL-RTG1
ZY3017-9	this study	MATa his3Δ1 leu2Δ0 met15Δ0 ura3Δ0, TIM44-GFP-KanMX, TRP1::p404-His3MX-pGAL-CBF1
ZY3017-11	this study	MATa his3Δ1 leu2Δ0 met15Δ0 ura3Δ0, TIM44-GFP-KanMX, TRP1::p404-His3MX-pGAL-ABF2
ZY3017-12	this study	MATa his3Δ1 leu2Δ0 met15Δ0 ura3Δ0, TIM44-GFP-KanMX, TRP1::p404-His3MX-pGAL-GLN3
ZY3017-13	this study	MATa his3Δ1 leu2Δ0 met15Δ0 ura3Δ0, TIM44-GFP-KanMX, TRP1::p404-His3MX-pGAL-PHO2
ZY3017-14	this study	MATa his3Δ1 leu2Δ0 met15Δ0 ura3Δ0, TIM44-GFP-KanMX, TRP1::p404-His3MX-pGAL-SOK2
ZY3017-16	this study	MATa his3Δ1 leu2Δ0 met15Δ0 ura3Δ0, TIM44-GFP-KanMX, TRP1::p404-His3MX-pGAL-SNF1
ZY4877	this study	MATa his3Δ1 leu2Δ0 met15Δ0 ura3Δ0, TIM44-GFP-KanMX, TRP1::p404-His3MX-pGAL-MTF1
ZY4878	this study	MATa his3Δ1 leu2Δ0 met15Δ0 ura3Δ0, TIM44-GFP-KanMX, pBY011-pGAL-RPO41
ZY4879	this study	MATa his3Δ1 leu2Δ0 met15Δ0 ura3Δ0, TIM44-GFP-KanMX, TRP1::p404-His3MX-pGAL-MTF1, pBY011-pGAL-RPO41
ZY2062	this study	MATa his3Δ1 leu2Δ0 met15Δ0 ura3Δ0, ADH3-GFP-His3MX, TRP1::p404-NatMX-pGAL-TOM70
ZY3230	this study	MATa his3Δ1 leu2Δ0 met15Δ0 ura3Δ0, ADH3-GFP-His3MX, TRP1::p404-NatMX-pGAL-TOM70, fkh1∆-KanMX
ZY3231	this study	MATa his3Δ1 leu2Δ0 met15Δ0 ura3Δ0, ADH3-GFP-His3MX, TRP1::p404-NatMX-pGAL-TOM70, fkh2∆-KanMX
ZY2067	this study	MATa his3Δ1 leu2Δ0 met15Δ0 ura3Δ0, QCR7-GFP-His3MX, TRP1::p404-NatMX-pGAL-TOM70
ZY3236	this study	MATa his3Δ1 leu2Δ0 met15Δ0 ura3Δ0, QCR7-GFP-His3MX, TRP1::p404-NatMX-pGAL-TOM70, fkh1∆-KanMX
ZY3237	this study	MATa his3Δ1 leu2Δ0 met15Δ0 ura3Δ0, QCR7-GFP-His3MX, TRP1::p404-NatMX-pGAL-TOM70, fkh2∆-KanMX
ZY2065	this study	MATa his3Δ1 leu2Δ0 met15Δ0 ura3Δ0, TIM44-GFP-His3MX, TRP1::p404-NatMX-pGAL-TOM70
ZY3242	this study	MATa his3Δ1 leu2Δ0 met15Δ0 ura3Δ0, TIM44-GFP-His3MX, TRP1::p404-NatMX-pGAL-TOM70, fkh1∆-KanMX
ZY3243	this study	MATa his3Δ1 leu2Δ0 met15Δ0 ura3Δ0, TIM44-GFP-His3MX, TRP1::p404-NatMX-pGAL-TOM70, fkh2∆-KanMX
ZY844	this study	MATa his3Δ1 leu2Δ0 met15Δ0 ura3Δ0, tom70Δ-KanMX
ZY2688	Huh et al., 2003	MATa his3Δ1 leu2Δ0 met15Δ0 ura3Δ0, Mip1-GFP-HisMX
ZY2846	this study	MATa his3Δ1 leu2Δ0 met15Δ0 ura3Δ0, Mip1-GFP-HisMX; TRP1::p404-NatMX-pGAL-TOM70
ZY2955	this study	MATa his3Δ1 leu2Δ0 met15Δ0 ura3Δ0, TOM70-GFP-KanMX, TRP1::p404-NatMX-pSu9-mCherry; TRP1::p404-HisMX-pGAL-MIP1
KY474	Pareek rt al., 2013	tim23ts L109P; Hsp104-GFP-NatMX
ZY3694	this study	tim23ts L109P; Hsp104-GFP-NatMX; TRP1::p404-hphMX-pGAL-TOM70 38TEV
ZY4576	this study	tim23ts L109P; Hsp104-GFP-NatMX; pBY011-pGAL-Hap4
ZY4577	this study	tim23ts L109P; Hsp104-GFP-NatMX；tom70Δ-KanMX
ZY3685	this study	MATa his3Δ1 leu2Δ0 met15Δ0 ura3Δ0, HSP104-GFP-HisMX, TRP1::p404TDH3-NatMX-pOLI-HcRed; TRP1::p404-HisMX-HphMX-pGAL-Tom70 38TEV
ZY388	Huh et al., 2003	MATa his3Δ1 leu2Δ0 met15Δ0 ura3Δ0, TOM70-GFP-His3MX
ZY2443	Huh et al., 2003	MATa his3Δ1 leu2Δ0 met15Δ0 ura3Δ0, TOM6-GFP-His3MX
ZY1791	this study	MATa his3Δ1 leu2Δ0 met15Δ0 ura3Δ0, TOM20-GFP-His3MX,TRP1::p404-hphMX-pGAL-TOM70 38TEV
ZY1792	this study	MATa his3Δ1 leu2Δ0 met15Δ0 ura3Δ0, ATP25-GFP-His3MX,TRP1::p404-hphMX-pGAL-TOM70 38TEV
ZY1793	this study	MATa his3Δ1 leu2Δ0 met15Δ0 ura3Δ0, YFH1-GFP-His3MX, TRP1::p404-hphMX-pGAL-TOM70 38TEV
ZY1794	this study	MATa his3Δ1 leu2Δ0 met15Δ0 ura3Δ0, LEU9-GFP-His3MX,TRP1::p404-hphMX-pGAL-TOM70 38TEV
ZY1520	this study	MATa his3Δ1 leu2Δ0 met15Δ0 ura3Δ0, HSP104-GFP-KanMX, TRP1::p404-His3MX-pGAL-TOM5
ZY1522	this study	MATa his3Δ1 leu2Δ0 met15Δ0 ura3Δ0, HSP104-GFP-KanMX, TRP1::p404-His3MX-pGAL-TOM6
ZY1524	this study	MATa his3Δ1 leu2Δ0 met15Δ0 ura3Δ0, HSP104-GFP-KanMX, TRP1::p404-His3MX-pGAL-TOM7
ZY1526	this study	MATa his3Δ1 leu2Δ0 met15Δ0 ura3Δ0, HSP104-GFP-KanMX, TRP1::p404-His3MX-pGAL-TOM20
ZY1528	this study	MATa his3Δ1 leu2Δ0 met15Δ0 ura3Δ0, HSP104-GFP-KanMX, TRP1::p404-His3MX-pGAL-TOM22
ZY1530	this study	MATa his3Δ1 leu2Δ0 met15Δ0 ura3Δ0, HSP104-GFP-KanMX, TRP1::p404-His3MX-pGAL-TOM40
ZY1532	this study	MATa his3Δ1 leu2Δ0 met15Δ0 ura3Δ0, HSP104-GFP-KanMX, TRP1::p404-His3MX-pGAL-TOM71
ZY1468	this study	MATa his3Δ1 leu2Δ0 met15Δ0 ura3Δ0, TOM70-GFP-His3MX, TRP1::p404-NatMX-pGAL-TOM70
ZY4403	this study	MATa his3Δ1 leu2Δ0 met15Δ0 ura3Δ0, ATP25-GFP-HisMX; TRP1::p404-NatMX-TDH3-preSu9-mCherry ; TRP1::pRS416-UraMX-Z3EV- pZ3-Tom70
ZY4404	this study	MATa his3Δ1 leu2Δ0 met15Δ0 ura3Δ0, Leu9-GFP-HisMX; TRP1::p404-NatMX-TDH3-preSu9-mCherry ; TRP1::pRS416-UraMX-Z3EV- pZ3-Tom70
ZY4405	this study	MATa his3Δ1 leu2Δ0 met15Δ0 ura3Δ0, Tom20-GFP-HisMX; TRP1::p404-NatMX-TDH3-preSu9-mCherry ; TRP1::pRS416-UraMX-Z3EV- pZ3-Tom70
ZY4406	this study	MATa his3Δ1 leu2Δ0 met15Δ0 ura3Δ0, YFH1-GFP-HisMX; TRP1::p404-NatMX-TDH3-preSu9-mCherry ; TRP1::pRS416-UraMX-Z3EV- pZ3-Tom70
ZY4578	this study	MATa his3Δ1 leu2Δ0 met15Δ0 ura3Δ0, Tom22-GFP-HisMX; TRP1::p404-NatMX-TDH3-preSu9-mCherry ; TRP1::pRS416-UraMX-Z3EV- pZ3-Tom70
ZY4579	this study	MATa his3Δ1 leu2Δ0 met15Δ0 ura3Δ0, Cox5A-GFP-HisMX; TRP1::p404-NatMX-TDH3-preSu9-mCherry ; TRP1::pRS416-UraMX-Z3EV- pZ3-Tom70
ZY4580	this study	MATa his3Δ1 leu2Δ0 met15Δ0 ura3Δ0, CCP1-GFP-HisMX; TRP1::p404-NatMX-TDH3-preSu9-mCherry ; TRP1::pRS416-UraMX-Z3EV- pZ3-Tom70
ZY4393	this study	MATa his3Δ1 leu2Δ0 met15Δ0 ura3Δ0, TRP1:: p404-HisMX-pGAL
ZY4394	this study	MATa his3Δ1 leu2Δ0 met15Δ0 ura3Δ0, TRP1:: p404-HisMX-pGAL; TRP1::pRS416-UraMX-Z3EV- pZ3-Tom70
ZY394	Huh et al., 2003	MATa his3Δ1 leu2Δ0 met15Δ0 ura3Δ0, ABF2-GFP-HisMX
ZY4342	Huh et al., 2003	MATa his3Δ1 leu2Δ0 met15Δ0 ura3Δ0, Phb1-GFP-HisMX
Zy4343	Huh et al., 2003	MATa his3Δ1 leu2Δ0 met15Δ0 ura3Δ0, Phb2-GFP-HisMX
ZY4348	this study	MATa his3Δ1 leu2Δ0 met15Δ0 ura3Δ0, ATP25-GFP-HisMX; tom70Δ-KanMX
ZY4349	this study	MATa his3Δ1 leu2Δ0 met15Δ0 ura3Δ0, Leu9-GFP-HisMX; tom70Δ-KanMX
ZY4350	this study	MATa his3Δ1 leu2Δ0 met15Δ0 ura3Δ0, Tom20-GFP-HisMX; tom70Δ-KanMX
ZY4351	this study	MATa his3Δ1 leu2Δ0 met15Δ0 ura3Δ0, YFH1-GFP-HisMX; tom70Δ-KanMX
ZY4352	this study	MATa his3Δ1 leu2Δ0 met15Δ0 ura3Δ0, ABF2-GFP-HisMX; tom70Δ-KanMX
ZY4353	this study	MATa his3Δ1 leu2Δ0 met15Δ0 ura3Δ0, MIP1-GFP-HisMX; tom70Δ-KanMX
ZY4354	this study	MATa his3Δ1 leu2Δ0 met15Δ0 ura3Δ0, QCR7-GFP-HisMX; tom70Δ-KanMX
ZY4355	this study	MATa his3Δ1 leu2Δ0 met15Δ0 ura3Δ0, Phb1-GFP-HisMX; tom70Δ-KanMX
ZY4356	this study	MATa his3Δ1 leu2Δ0 met15Δ0 ura3Δ0, Phb2-GFP-HisMX; tom70Δ-KanMX
ZY1276	this study	MATa his3Δ1 leu2Δ0 met15Δ0 ura3Δ0, TRP1::p404-HisMX-pGal-Tom70
ZY1278	this study	MATa his3Δ1 leu2Δ0 met15Δ0 ura3Δ0, TRP1::p404-HisMX-pGal-Tom70tm-mCherry
ZY1976	this study	MATa his3Δ1 leu2Δ0 met15Δ0 ura3Δ0, TOM70-GFP-KanMX, TRP1::p404-NatMX-pSu9-mCherry; TRP1::p404-His3MX-pGAL-RTG3
ZY1977	this study	MATa his3Δ1 leu2Δ0 met15Δ0 ura3Δ0, TOM70-GFP-KanMX, TRP1::p404-NatMX-pSu9-mCherry; TRP1::p404-His3MX-pGAL-ABF1
ZY1978	this study	MATa his3Δ1 leu2Δ0 met15Δ0 ura3Δ0, TOM70-GFP-KanMX, TRP1::p404-NatMX-pSu9-mCherry; TRP1::p404-His3MX-pGAL-HAP4
ZY1979	this study	MATa his3Δ1 leu2Δ0 met15Δ0 ura3Δ0, TOM70-GFP-KanMX, TRP1::p404-NatMX-pSu9-mCherry; TRP1::p404-His3MX-pGAL-ROX1
ZY1980	this study	MATa his3Δ1 leu2Δ0 met15Δ0 ura3Δ0, TOM70-GFP-KanMX, TRP1::p404-NatMX-pSu9-mCherry; TRP1::p404-His3MX-pGAL-MIG1
ZY1990	this study	MATa his3Δ1 leu2Δ0 met15Δ0 ura3Δ0, TOM70-GFP-KanMX, TRP1::p404-NatMX-pSu9-mCherry; TRP1::p404-His3MX-pGAL-GIS1
ZY3304	this study	MATa his3Δ1 leu2Δ0 met15Δ0 ura3Δ0, TOM70-GFP-KanMX, TRP1::p404-His3MX-pGAL-GAT3
ZY3305	this study	MATa his3Δ1 leu2Δ0 met15Δ0 ura3Δ0, TOM70-GFP-KanMX, TRP1::p404-His3MX-pGAL-RTG3
ZY3306	this study	MATa his3Δ1 leu2Δ0 met15Δ0 ura3Δ0, TOM70-GFP-KanMX, TRP1::p404-His3MX-pGAL-GCN4
ZY3307	this study	MATa his3Δ1 leu2Δ0 met15Δ0 ura3Δ0, TOM70-GFP-KanMX, TRP1::p404-His3MX-pGAL-FKH1
ZY3308	this study	MATa his3Δ1 leu2Δ0 met15Δ0 ura3Δ0, TOM70-GFP-KanMX, TRP1::p404-His3MX-pGAL-FKH2
ZY3309	this study	MATa his3Δ1 leu2Δ0 met15Δ0 ura3Δ0, TOM70-GFP-KanMX, TRP1::p404-His3MX-pGAL-GIS1
ZY3310	this study	MATa his3Δ1 leu2Δ0 met15Δ0 ura3Δ0, TOM70-GFP-KanMX, TRP1::p404-His3MX-pGAL-HSF1
ZY1717	this study	MATa his3Δ1 leu2Δ0 met15Δ0 ura3Δ0, TOM70-GFP-His3MX, TRP1::p404-NatMX-pSu9-mCherry; TRP1::p404-URA3-pTDH3-TOM70 38TEV-GFP
ZY2940	this study	MATa his3Δ1 leu2Δ0 met15Δ0 ura3Δ0, Tom70-GFP-KanMX, TRP1::p404-NatMX-pSu9-mCherry, TRP1::p404-His3MX- pGAL-BAS1
ZY2941	this study	MATa his3Δ1 leu2Δ0 met15Δ0 ura3Δ0, Tom70-GFP-KanMX, TRP1::p404-NatMX-pSu9-mCherry, TRP1::p404-His3MX- pGAL-CBF1
ZY2942	this study	MATa his3Δ1 leu2Δ0 met15Δ0 ura3Δ0, Tom70-GFP-KanMX, TRP1::p404-NatMX-pSu9-mCherry, TRP1::p404-His3MX- pGAL-GAT3
ZY2943	this study	MATa his3Δ1 leu2Δ0 met15Δ0 ura3Δ0, Tom70-GFP-KanMX, TRP1::p404-NatMX-pSu9-mCherry, TRP1::p404-His3MX- pGAL-GCN4
ZY2944	this study	MATa his3Δ1 leu2Δ0 met15Δ0 ura3Δ0, Tom70-GFP-KanMX, TRP1::p404-NatMX-pSu9-mCherry, TRP1::p404-His3MX- pGAL-INO2
ZY2945	this study	MATa his3Δ1 leu2Δ0 met15Δ0 ura3Δ0, Tom70-GFP-KanMX, TRP1::p404-NatMX-pSu9-mCherry, TRP1::p404-His3MX- pGAL-INO4
ZY2946	this study	MATa his3Δ1 leu2Δ0 met15Δ0 ura3Δ0, Tom70-GFP-KanMX, TRP1::p404-NatMX-pSu9-mCherry, TRP1::p404-His3MX- pGAL-MET28
ZY2947	this study	MATa his3Δ1 leu2Δ0 met15Δ0 ura3Δ0, Tom70-GFP-KanMX, TRP1::p404-NatMX-pSu9-mCherry, TRP1::p404-His3MX- pGAL-MET31
ZY2948	this study	MATa his3Δ1 leu2Δ0 met15Δ0 ura3Δ0, Tom70-GFP-KanMX, TRP1::p404-NatMX-pSu9-mCherry, TRP1::p404-His3MX- pGAL-MET32
ZY2949	this study	MATa his3Δ1 leu2Δ0 met15Δ0 ura3Δ0, Tom70-GFP-KanMX, TRP1::p404-NatMX-pSu9-mCherry, TRP1::p404-His3MX- pGAL-MSN2
ZY2950	this study	MATa his3Δ1 leu2Δ0 met15Δ0 ura3Δ0, Tom70-GFP-KanMX, TRP1::p404-NatMX-pSu9-mCherry, TRP1::p404-His3MX- pGAL-MSN4
ZY2951	this study	MATa his3Δ1 leu2Δ0 met15Δ0 ura3Δ0, Tom70-GFP-KanMX, TRP1::p404-NatMX-pSu9-mCherry, TRP1::p404-His3MX- pGAL-PDR3
ZY2952	this study	MATa his3Δ1 leu2Δ0 met15Δ0 ura3Δ0, Tom70-GFP-KanMX, TRP1::p404-NatMX-pSu9-mCherry, TRP1::p404-His3MX- pGAL-RPN4
ZY2953	this study	MATa his3Δ1 leu2Δ0 met15Δ0 ura3Δ0, Tom70-GFP-KanMX, TRP1::p404-NatMX-pSu9-mCherry, TRP1::p404-His3MX- pGAL-SFP1
ZY2954	this study	MATa his3Δ1 leu2Δ0 met15Δ0 ura3Δ0, Tom70-GFP-KanMX, TRP1::p404-NatMX-pSu9-mCherry, TRP1::p404-His3MX- pGAL-MOT3
ZY2958	this study	MATa his3Δ1 leu2Δ0 met15Δ0 ura3Δ0, Tom70-GFP-KanMX, TRP1::p404-NatMX-pSu9-mCherry, TRP1::p404-His3MX- pGAL-RTG1
ZY2696	this study	MATa his3Δ1 leu2Δ0 met15Δ0 ura3Δ0, Tom70-GFP-His3MX, TRP1::p404-NatMX-pSu9-mCherry, pBY011- pGAL-GLN3
ZY2698	this study	MATa his3Δ1 leu2Δ0 met15Δ0 ura3Δ0, Tom70-GFP-His3MX, TRP1::p404-NatMX-pSu9-mCherry, pBY011- pGAL-YAP1
ZY2699	this study	MATa his3Δ1 leu2Δ0 met15Δ0 ura3Δ0, Tom70-GFP-His3MX, TRP1::p404-NatMX-pSu9-mCherry, pBY011- pGAL-YAP1
ZY2700	this study	MATa his3Δ1 leu2Δ0 met15Δ0 ura3Δ0, Tom70-GFP-His3MX, TRP1::p404-NatMX-pSu9-mCherry, pBY011- pGAL-MOT3
ZY2702	this study	MATa his3Δ1 leu2Δ0 met15Δ0 ura3Δ0, Tom70-GFP-His3MX, TRP1::p404-NatMX-pSu9-mCherry, pBY011- pGAL-HSF1
ZY2703	this study	MATa his3Δ1 leu2Δ0 met15Δ0 ura3Δ0, Tom70-GFP-His3MX, TRP1::p404-NatMX-pSu9-mCherry, pBY011- pGAL-MIG1
ZY2704	this study	MATa his3Δ1 leu2Δ0 met15Δ0 ura3Δ0, Tom70-GFP-His3MX, TRP1::p404-NatMX-pSu9-mCherry, pBY011- pGAL-NDT80
ZY2705	this study	MATa his3Δ1 leu2Δ0 met15Δ0 ura3Δ0, Tom70-GFP-His3MX, TRP1::p404-NatMX-pSu9-mCherry, pBY011- pGAL-GZF3
ZY2706	this study	MATa his3Δ1 leu2Δ0 met15Δ0 ura3Δ0, Tom70-GFP-His3MX, TRP1::p404-NatMX-pSu9-mCherry, pBY011- pGAL-HAC1
ZY2707	this study	MATa his3Δ1 leu2Δ0 met15Δ0 ura3Δ0, Tom70-GFP-His3MX, TRP1::p404-NatMX-pSu9-mCherry, pBY011- pGAL-GCR1
ZY2708	this study	MATa his3Δ1 leu2Δ0 met15Δ0 ura3Δ0, Tom70-GFP-His3MX, TRP1::p404-NatMX-pSu9-mCherry, pBY011- pGAL-RTG1
ZY2709	this study	MATa his3Δ1 leu2Δ0 met15Δ0 ura3Δ0, Tom70-GFP-His3MX, TRP1::p404-NatMX-pSu9-mCherry, pBY011- pGAL-NRG1
ZY2710	this study	MATa his3Δ1 leu2Δ0 met15Δ0 ura3Δ0, Tom70-GFP-His3MX, TRP1::p404-NatMX-pSu9-mCherry, pBY011- pGAL-FKH1
ZY2714	this study	MATa his3Δ1 leu2Δ0 met15Δ0 ura3Δ0, Tom70-GFP-His3MX, TRP1::p404-NatMX-pSu9-mCherry, pBY011- pGAL-GIS1
ZY2716	this study	MATa his3Δ1 leu2Δ0 met15Δ0 ura3Δ0, Tom70-GFP-His3MX, TRP1::p404-NatMX-pSu9-mCherry, pBY011- pGAL-RTG2
ZY2717	this study	MATa his3Δ1 leu2Δ0 met15Δ0 ura3Δ0, Tom70-GFP-His3MX, TRP1::p404-NatMX-pSu9-mCherry, pBY011- pGAL-MKS1
ZY2727	this study	MATa his3Δ1 leu2Δ0 met15Δ0 ura3Δ0, Tom70-GFP-His3MX, TRP1::p404-NatMX-pSu9-mCherry, pBY011- pGAL-RTG3
ZY2729	this study	MATa his3Δ1 leu2Δ0 met15Δ0 ura3Δ0, Tom70-GFP-His3MX, TRP1::p404-NatMX-pSu9-mCherry, pBY011- pGAL-HAP4
ZY2732	this study	MATa his3Δ1 leu2Δ0 met15Δ0 ura3Δ0, Tom70-GFP-His3MX, TRP1::p404-NatMX-pSu9-mCherry, pBY011- pGAL-GAT1
ZY2734	this study	MATa his3Δ1 leu2Δ0 met15Δ0 ura3Δ0, Tom70-GFP-His3MX, TRP1::p404-NatMX-pSu9-mCherry, pBY011- pGAL-FKH2
ZY2736	this study	MATa his3Δ1 leu2Δ0 met15Δ0 ura3Δ0, Tom70-GFP-His3MX, TRP1::p404-NatMX-pSu9-mCherry, pBY011- pGAL-ROX1
ZY4395	this study	MATa his3Δ1 leu2Δ0 met15Δ0 ura3Δ0, TOM70-GFP-His3MX, TRP1::p404-NatMX-pSu9-mCherry; TRP1::pRS416-UraMX-Z3EV- pZ3-Tom70
ZY1812	this study	MATa his3Δ1 leu2Δ0 met15Δ0 ura3Δ0, TOM70-GFP-His3MX, dnm1∆-KanMX
ZY1813	this study	MATa his3Δ1 leu2Δ0 met15Δ0 ura3Δ0, TOM70-GFP-His3MX, fis1∆-KanMX
ZY358	Huh et al., 2003	MATa his3Δ1 leu2Δ0 met15Δ0 ura3Δ0, Dnm1-GFP-His3MX
