# Supplementary material for: Tom70-based transcriptional regulation of mitochondrial biogenesis and aging
Source: eLife. 2022 Mar 2;11:e75658. doi: 10.7554/eLife.75658 (PMC8926401; doi:10.7554/eLife.75658)
Supplement: Supplementary file 2. [file elife-75658-supp2.xlsx]

## Sheet: qPCR primers
REAGENT or RESOURCE	SOURCE	IDENTIFIER
K1789_ATP1_F	this study	ACTGCTGCTATTCGTTCTCTATC
K1790_ATP1_R	this study	CCTTGGTGGAAGCCAATCT
K1791_ATP2_F	this study	CTACATCCCGTGCTGCTTT
K1792_ATP2_R	this study	CCGGTGATTGGAGTAGATTGAG
K1793_MFB1_F	this study	AAGGTCCCTGACAAACTTACC
K1794_MFB1_R	this study	TCATTCGCCAGCATCCTTAG
K1795_MDL1_F	this study	GCATCAGCAAGTGCACTATATTC
K1796_MDL1_R	this study	TCGAATCGACCGCAACAA
K1797_Aco1_F	this study	CTGCCATCAAGAGACCCATT
K1798_Aco1_R	this study	ATCCAGCGTTTCCACATTCT
K1799_Cit1_F	this study	GGCTCCACAAGACAATGTCAAA
K1800_Cit1_R	this study	TTTGTTCGGAGGCGCTACTA
K1803_cox5A_F	this study	GCTGGTGGACTATCACGTATT
K1804_Cox5A_R	this study	TGTTCTCCCATCTGGATTGC
K1820_ATP25_F	this study	TCATAGTCACATCACAGCAGTTTA
K1821_ATP25_R	this study	GGTACCAAGGTGTTTCCAGAG
K1830_Tom20_F	this study	CTCTATCAGCCACCGGTTATG
K1831_Tom20_R	this study	TGCTCTTTGGCCCTTTGT
K1828_PSD1_F	this study	GAGGATGCCTGCTGTAAAGT
K1829_PSD1_R	this study	CGATCCACAATCTCTCCAGAAC
K2189_FMC1_F	this study	GGACAACCAAAGAGAATACGAGG
K2190_FMC1_R	this study	ACCACGTTTGCAGTTCTTTTC
K2191_ADH3_F	this study	TGAAGGTGCTGGTGTAGTTG
K2192_ADH3_R	this study	TCGCATGTCATACAAGAACCG
K2193_ZIM17_F	this study	GCTTTCACCTGCAAGAAATGTAA
K2194_ZIM17_R	this study	CAGTGCGGACAAGAGATCAA
K2195_TIM16_F	this study	CTCACAGGGCTTTCATACAGG
K2196_TIM16_R	this study	CCTTTTCCTGTTCCCCTTCTAG
K2197_TIM44_F	this study	GGTAAGAACACAAGAAAGGCG
K2198_TIM44_R	this study	GAACTCTCCCCATCGTCAATG
K2199_PUT2_F	this study	CATCCGCAAGTCCAATTTCTG
K2200_PUT2_R	this study	CACCGTAAAGAATTTCCAACTCG
K2201_QCR7_F	this study	CGTCTATTGCGAGAATTGGTG
K2202_QCR7_R	this study	GAACTGATTGGCAACTGGAAC
K2203_YTA10_F	this study	ACGCTCATTGACATCACTCTC
K2204_YTA10_R	this study	TGGGTAGAACGGTGTATTGTG
K2205_TIM23_F	this study	GCACTAAGAGGCAAACATGAC
K2206_TIM23_R	this study	CTTGACACTACACCAGACGG
K2207_TIM50_F	this study	CGACAAGCCTAAATCCATTCTTAC
K2208_TIM50_R	this study	CTCCTCCTTCTCCTGATGTTTC
K2209_CCP1_F	this study	GCCCGTATTAGTCCGTCTTG
K2210_CCP1_R	this study	TCCAGGAACTTGAAGCCATTC
K2827_Tom22_F	this study	ACAAAATCCGGAAACCTTGC
K2828_Tom22_R	this study	CGGCAAGTATAGATAAGGATAGTGG
K2213_Tom40_F	this study	TGTCTGCACCAACTCCATTAG
K2214_Tom40_R	this study	TCGCAGTCAAAGGAGAAAGG
K2215_Tom70_F	this study	GTTTGGCGATATTGACACCG
K2216_Tom70_R	this study	GTCTTTGCGTTCTTTAGCTGG
K2217_Tom71_F	this study	GAATGGTGACTTTGATGGAGC
K2218_Tom71_R	this study	GACGCCAGAGATGTGTTAGAC
K2221-YFH1_F	this study	TGGCGTAATGACATTGGAAATTC
K2222_YFH1_R	this study	TTCTTAACGAAACCCACTCCC
K2223_Leu9_F	this study	AATTGAACCCAGAGCGTAGAG
K2224_Leu9_R	this study	TTCCGTAGCCTTCGATGTTG
K2518_Tom6 _F	this study	CTCCCCACAACAACCAAAATC
K2519_Tom6_R	this study	CATGAGTGGAGATTGAATAAACGC
K2520_Tom7_F	this study	GGCTGGATCCCATTTGTTTTG
K2521_Tom7_R	this study	TTGGTAACGGAGACAGTAAGTTC
K2225_Actin_F	this study	TCGAACAAGAAATGCAAACCG
K2226_Actin_R	this study	GGCAGATTCCAAACCCAAAAC
K2227_Tubulin_F	this study	TGTGATGGGTTACAAGGGTTC
K2228_Tubulin_R	this study	AGGGTATACGGCAAATTCCAG
K2588_Pdr3_F	this study	GATAGTTCCCAGTCTTTGCCT
K2589_Pdr3_R	this study	AGCTTAATCGCAGTGTCCAG
K2594_Hap4_F	this study	CGATGTGGAAACCATTGCTG
K2595_Hap4_R	this study	CCGATGAAGATGTGGAAGATAAGG
K2598_Gcn4_F	this study	CTTCCACAAACGGCAACTG
K2599_Gcn4_R	this study	AGAAAGATTCCACTACAGCGTC
K2600_Mig1_F	this study	AGGACCCGTCTAACTCTAGTATC
K2601_Mig1_R	this study	CCCCAAAGTGTGCAAATTCG
K2602_Rgt1_F	this study	TCCTTTCAGACCTTTGCCG
K2603_Rgt1_R	this study	TGTCCTGAGTATTCTGCGTTG
K2604_ABF1_F	this study	TCTGGCACGAACTTGAGAAG
K2605_ABF1_R	this study	TGGTTGTGTTCGATGAGGTAC
K2606_Gln3_F	this study	TTGGGACTTTAACGTGGACC
K2607_Gln3_R	this study	AGGATTTGGAGACGCTGTTG
K2608_HSF1_F	this study	GACCACAGTTATTCCACCCAG
K2609_HSF1_R	this study	GGTGATCGTTGTACTCTGTCG
K2610_Yap1_F	this study	GGCTCTTTACTAAGGTGTTCGG
K2611_Yap1_R	this study	TGACAACCCCTCTTTCTGAAC
K2612_Ndt80p_F	this study	ATCAATCTCGTCCAGCATACAG
K2613_Ndt80p_R	this study	CACCAACGGACATACTGAAGG
K2618_Rpn4_F	this study	AGGAGCCTTTACTGTCATTGG
K2619_Rpn4_R	this study	GCTGTCCATGTTAGAGTCAACG
K2622_Bas1_F	this study	TGATCCCAACTAATTCTACCGC
K2623_Bas1_R	this study	TCTGAACCGCTCGTTGTATATG
K2626_Rox1_F	this study	AGATTCCAAGACCCAAGAACG
K2627_Rox1_R	this study	GTAAGCCCTTCCACTTCGTAC
K2630_Fkh1_F	this study	GGTTTTCTCAAATGGCGTGG
K2631_Fkh1_R	this study	TCTTTTGGGCACCTTCTCG
K2632_Fkh2_F	this study	CAGATCAGCCAACTACCGTATC
K2633_Fkh2_R	this study	GGTCCGGAGAGTTTAGCATAAG
K2634_Gcr1_F	this study	AACCGCCAGAGTCAAGTAAG
K2635_Gcr1_R	this study	TTGTCAGCATCCGTACCAAG
K2636_Mot3_F	this study	ACAGCCTTTCAACACGACTAC
K2637_Mot3_R	this study	TGTAAGGGCATTGGAAGTTCTC
K2673_Met31_F	this study	CATCAAGTCCCACTCATACGG
K2674_Met31_R	this study	GACCTCTAGCCATATTTTCCGG
K2675_CBF1_F	this study	GCCGCTACCGTCAATTATACAG
K2676_CBF1_R	this study	GGCTTGACTCCTTCATTTGATG
K2679_Sfp1_F	this study	GCGTAATAGATCCAGATTCGACAG
K2680_Sfp1_R	this study	CTCTTACCACAAACTTCACAACG
K2681_Msn2_F	this study	CAGAGGAAGGTGAACAAAATGC
K2682_Msn2_R	this study	TGCTGTGGGAAATGGTGATAG
K2683_Msn4_F	this study	CGACAATAACGTAGACCCCTTC
K2684_Msn4_R	this study	ATCAACACCAGAAGTCGCC
K2687_Gat1_F	this study	TCGCACCTTTGAAGTCTCAG
K2688_Gat1_R	this study	GAGTGTTAGAGCGGAGGTATTG
K2388_RTG1_F	this study	GCAATTCTGGTAGCAATGACAC
K2389_RTG1_R	this study	GTGATATGTACTCTACCGCCTG
K2392_RTG3_F	this study	CCGTATCTTCCACATATTCCCC
K2393_RTG3_R	this study	TGTGTCTTGTTCTGGGTGTG
K2616_Nrg1_F	this study	GGAAGCAAAGAACAGATCCAAG
K2617_Nrg1_R	this study	CCCGATGTAGTGAATCCTCTTG
K2624_Mot2_F	this study	CAAACCGTCTCACAGCAAATC
K2625_Mot2_R	this study	TTGTGGACCAAAGATACCCG
K2400_HAC1_F	this study	GGCTATCCCTACCAACTTCAAG
K2401_HAC_R	this study	CGCTGTTCCTTTTCCTCTTTTG
K2628_Ash1_F	this study	GACGAAAAGTGGCAAGATGAG
K2629_Ash1_R	this study	ATGATCTTCGAGGGCTTTGAG
K2590_Hap2_F	this study	TCCAAGAGGCGAAGATCAAC
K2591_Hap2_R	this study	GGTTCCATCGTACTGACACTG
K2640_Stb5_F	this study	CAATCGCAATACTAGCAACGG
K2641_Stb5_R	this study	CGGCACAGAATCGAATTTCC
K2620_Oaf1_F	this study	CTCTACCAAGCCATATTCGGAG
K2621_Oaf1_R	this study	ATGTGTTTCGGAGTTCTCGG
K2677_Pdr1_F	this study	CGGTGTACATATTGAGACGGG
K2678_Pdr1_R	this study	ACTTTCGACCTTGGCTTACG
K2614_Skn7_F	this study	CTGAGAACGGCAAAAGTTTCG
K2615_Skn7_R	this study	CTCGGGACTTCTCTTAACCTTG
K2669_Sok2_F	this study	ACTCGCATTCTCCAATTCCTC
K2670_Sok2_R	this study	ATCATACAACGGGCTCACC
K2592_Hap3_F	this study	CTCAGGAGAACGGTGGAAAC
K2593_Hap3_R	this study	TCGCATCTTTCGATACCTTAGC
K2642_snf1_F	this study	CCAATGCAAATTCTAGCCACC
K2643_snf1_R	this study	TTGGTAGTTCCCGATATGTGC
K2638_Pho2_F	this study	AACCACAACCACAACCAATTC
K2639_Pho2_R	this study	TTTGAGGTCCACTATCTGATGC
K2596_Hap5_F	this study	AAGCTAATCTACCGCCAAGTG
K2597_Hap5_R	this study	TTCATCGTCCTCGTCCATTTC
K2689_CCR4_F	this study	TCACTGGTAGACTGCACAAAG
K2690_CCR4_R	this study	TGGGAGTCAATGGTGTAGAAAC
K4717_Rpo41_F	this study	GACGGTACTTGCAATGGTTTG
K4718_Rpo41_R	this study	CATCTTGTGGTTTATCGCTTGG
K4721_Mtf1_F	this study	CAGACGCAAATGAATTGAAGGG
K4722_Mtf1_R	this study	CGTCAAAATCGAAGTCAATTGGG
K2825_ABF2_F	this study	CCCCTTTTCAATTTGGCTAGC
K2826_ABF2_R	this study	AGCAGATGTGGGCCTTTTAG
