# Supplementary material for: Tom70-based transcriptional regulation of mitochondrial biogenesis and aging
Source: eLife. 2022 Mar 2;11:e75658. doi: 10.7554/eLife.75658 (PMC8926401; doi:10.7554/eLife.75658)
Supplement: Supplementary file 3. [file elife-75658-supp3.xlsx]

## Sheet: Figure 
REAGENT or RESOURCE	SOURCE	IDENTIFIER
Kp206	this study	p404-His3MX-pGAL-TOM70
Kp259	this study	p404-His3MX-pGAL1-TOM70tm-mCherry
Rp012	Ruan et al., 2017	p404-NatMX-pSu9-mCherry
Kp370	this study	p404-hphMX-pGAL-TOM70 38TEV
Kp210	this study	p404-His3MX-pGAL-TOM70 cytosolic domain
Kp230	this study	pRS306-pTOM70-TOM70 38TEV-GFP
Kp237	this study	p404-NatMX-GAL-TOM20tm-TEV
Kp508	Douglas et al., 2012	pBY011-pGAL-FKH1
Kp532	Douglas et al., 2012	pBY011-pGAL-FKH2
Kp395	this study	p404-NatMX-pGAL-TOM70
Kp287	this study	p404-His3MX-pGAL-TOM5
Kp285	this study	p404-His3MX-pGAL-TOM6
Kp286	this study	p404-His3MX-pGAL-TOM7
Kp274	this study	p404-His3MX-pGAL-TOM20
Kp288	this study	p404-His3MX-pGAL-TOM22
Kp289	this study	p404-His3MX-pGAL-TOM40
Kp290	this study	p404-His3MX-pGAL-TOM71
Kp394	this study	p404-NatMX-pGAL-TOM70-GFP
Kp569	this study	p404-His3MX-pGAL-RTG3
Kp570	this study	p404-His3MX-pGAL-ABF1
Kp571	this study	p404-His3MX-pGAL-HAP4
Kp572	this study	p404-His3MX-pGAL-ROX1
Kp573	this study	p404-His3MX-pGAL-MIG1
Kp584	this study	p404-His3MX-pGAL-GIS1
Kp716	this study	p404-His3MX-pGAL-ABF2
Kp702	this study	p404-His3MX-pGAL-GAT3
Kp703	this study	p404-His3MX-pGAL-GCN4
Kp768	this study	p404-His3MX-pGAL-FKH1
Kp769	this study	p404-His3MX-pGAL-FKH2
Kp584	this study	p404-His3MX-pGAL-GIS1
Kp770	this study	p404-His3MX-pGAL-HSF1
Kp480	this study	p404-NatMX-pGAL-TOM70-mCherry
Kp250	this study	p404-His3MX-pGAL-TOM70 38TEV
Kp592	this study	p404-NatMX-pTDH3-Tom70
Kp711	this study	p404-His3MX-pGAL-PDR3
Kp700	this study	p404-His3MX-pGAL-BAS1
Kp707	this study	p404-His3MX-pGAL-MET31
Kp709	this study	p404-His3MX-pGAL-MSN2
Kp710	this study	p404-His3MX-pGAL-MSN4
Kp717	this study	p404-His3MX-pGAL-CCR4
Kp718	this study	p404-His3MX-pGAL-RTG1
Kp701	this study	p404-His3MX-pGAL-CBF1
Kp715	this study	p404-His3MX-pGAL-MIP1
Kp716	this study	p404-His3MX-pGAL-ABF2
Kp739	this study	p404-His3MX-pGAL-GLN3
Kp740	this study	p404-His3MX-pGAL-PHO2
Kp742	this study	p404-His3MX-pGAL-SOK2
Kp741	this study	p404-His3MX-pGAL-SNF1
Kp704	this study	p404-His3MX- pGAL-INO2
Kp705	this study	p404-His3MX- pGAL-INO4
Kp706	this study	p404-His3MX- pGAL-MET28
Kp707	this study	p404-His3MX- pGAL-MET31
Kp708	this study	p404-His3MX- pGAL-MET32
Kp712	this study	p404-His3MX- pGAL-RPN4
Kp713	this study	p404-His3MX- pGAL-SFP1
Kp714	this study	p404-His3MX- pGAL-MOT3
Kp494	Douglas et al., 2012	pBY011- pGAL-GLN3
Kp495	Douglas et al., 2012	pBY011- pGAL-ABF1
Kp496	Douglas et al., 2012	pBY011- pGAL-YAP1
Kp497	Douglas et al., 2012	pBY011- pGAL-YAP1
Kp498	Douglas et al., 2012	pBY011- pGAL-MOT3
Kp499	Douglas et al., 2012	pBY011- pGAL-ASH1
Kp500	Douglas et al., 2012	pBY011- pGAL-HSF1
Kp501	Douglas et al., 2012	pBY011- pGAL-MIG1
Kp502	Douglas et al., 2012	pBY011- pGAL-NDT80
Kp503	Douglas et al., 2012	pBY011- pGAL-GZF3
Kp504	Douglas et al., 2012	pBY011- pGAL-HAC1
Kp505	Douglas et al., 2012	pBY011- pGAL-GCR1
Kp506	Douglas et al., 2012	pBY011- pGAL-RTG1
Kp507	Douglas et al., 2012	pBY011- pGAL-NRG1
Kp508	Douglas et al., 2012	pBY011- pGAL-FKH1
Kp512	Douglas et al., 2012	pBY011- pGAL-GIS1
Kp514	Douglas et al., 2012	pBY011- pGAL-RTG2
Kp515	Douglas et al., 2012	pBY011- pGAL-MKS1
Kp517	Douglas et al., 2012	pBY011- pGAL-RTG1
Kp518	Douglas et al., 2012	pBY011- pGAL-HAP5
Kp519	Douglas et al., 2012	pBY011- pGAL-HAP3
Kp523	Douglas et al., 2012	pBY011- pGAL-HAP2
Kp525	Douglas et al., 2012	pBY011- pGAL-RTG3
Kp527	Douglas et al., 2012	pBY011- pGAL-HAP4
Kp530	Douglas et al., 2012	pBY011- pGAL-GAT1
Kp532	Douglas et al., 2012	pBY011- pGAL-FKH2
Kp534	Douglas et al., 2012	pBY011- pGAL-ROX1
Kp971	this study	pRS416-UraMX-Z3EV-pZ3-Tom70
Kp1086	this study	p404-His3MX- pGAL-MTF1
Kp1089	Douglas et al., 2012	pBY011- pGAL-Rpo41
