# Supplementary material for: Tom70-based transcriptional regulation of mitochondrial biogenesis and aging
Source: eLife. 2022 Mar 2;11:e75658. doi: 10.7554/eLife.75658 (PMC8926401; doi:10.7554/eLife.75658)
Supplement: Supplementary file 4. [file elife-75658-supp4.xlsx]

## Sheet: Figure 1B
strain	sample size
MFB1GFP_WT	221
MFB1_TOM70OE	279
FMC1GFP_WT	120
FMC1_Tom70OE	237
ADH3GFP_WT	267
ADH3_TOM70OE	349
TIM16GFP_WT	161
TIM16_TOM70OE	315
TIM44GFP_WT	129
TIM44GFP_TOM70OE	183
PUT2GFP_WT	195
PUT2GFP_TOM70OE	279
QCR7GFP_WT	190
QCR7GFP_TOM70OE	351
YTA10GFP_WT	121
YTA10GFP_TOM70OE	125
TIM23GFP_WT
TIM23GFP_TOM70OE	229
TIM50GFP_WT	154
TIM50GFP_TOM70OE	316
COX5AGFP_WT	218
COX5AGFP_TOM70OE	233
CCP1GFP_WT	152
CCP1GFP_TOM70OE	276
ATP1GFP_WT	236
ATP1GFP_TOM70OE	225
ATP2GFP_WT	196
ATP2GFP_TOM70OE	168
ACO1GFP_WT	252
ACO1GFP_TOM70OE	245
MDL1GFP_WT	167
MDL1GFP_TOM70OE	275
CIT1GFP_WT	291
CIT1GFP_TOM70OE	282
ATP25GFP_WT	212
ATP25GFP_TOM70OE	537
YFH1GFP_WT	186
YFH1GFP_TOM70OE	443
LEU9GFP_WT	232
LEU9GFP_TOM70OE	305
TOM7GFP_WT	176
TOM7GFP_TOM70OE	443
TOM20GFP_WT	257
TOM20GFP_TOM70OE	246
TOM22GFP_WT	131
TOM22GFP_TOM70OE	331
TOM71GFP_WT	235
TOM71GFP_TOM70OE	337

## Sheet: Figure 2D
strain	sample size
ADH3GFP_WT	144
ADH3GFP_FKH2OE	136
QCR7GFP_WT	167
QCR7GFP_FKH2OE	96
TIM44GFP_WT	87
TIM44GFP_FKH2OE	128

## Sheet: Figure 2E
strain	sample size
ADH3GFP_WT	267
ADH3GFP_TOM70OE	228
ADH3GFP_TOM70OE_∆fkh1	256
ADH3GFP_TOM70OE_∆fkh2	235
QCR7GFP_WT	275
QCR7GFP_TOM70OE	135
QCR7GFP_TOM70OE_∆fkh1	237
QCR7GFP_TOM70OE_∆fkh2	219
TIM44GFP_WT	268
TIM44GFP_TOM70OE	186
TIM44GFP_TOM70OE_∆fkh1	229
TIM44GFP_TOM70OE_∆fkh2	296

## Sheet: Figure 4C
strain	sample size
tim23ts	454
∆tom70	612
∆tom70; tim23ts	512
TOM70 OE	420
TOM70 OE; tim23ts	278
HAP4OE; tim23ts	312

## Sheet: Figure 5B
samples	sample size
Tom70GFP_Young	162
Tom70GFP_old	37
Tom71GFP_Young	101
Tom71GFP_Old	24
Tom20GFP_Young	136
Tom20GFP_Old	29
Tom22GFP_Young	69
Tom22GFP_Old	20
Tom6GFP_Young	58
Tom6GFP_old	20
Tom7GFP_Young	67
Tom7GFP_Old	30
mitoRFP_Young	162
MitoRFP_old	37

## Sheet: Figure 5D
samples	sample size
WT_young	139
WT_old	50
TOM20OE_young	175
TOM20OE_old	44
TOM22OE_young	111
TOM22OE_old	24
TOM71OE_young	52
TOM71OE_old	11
TOM5OE_young	145
TOM5OE_old	42
TOM6OE_young	120
TOM6OE_old	25
TOM7OE_young	221
TOM7OE_old	38

## Sheet: Figure 5F
samples	sample size
Atp25GFP_wt_young	82
Atp25GFP_wt_old	22
Atp25GFP_TOM70OE_young	47
Atp25GFP_TOM70OE_old	23
Leu9GFP_wt_young	101
Leu9GFP_wt_old	23
Leu9GFP_TOM70OE_young	49
Leu9GFP_TOM70OE_old	21
Tom20GFP_wt_young	99
Tom20GFP_wt_old	21
Tom20GFP_TOM70OE_young	61
Tom20GFP_TOM70OE_old	24
Yfh1GFP_wt_young	65
Yfh1GFP_wt_old	21
Yfh1GFP_TOM70OE_young	78
Yfh1GFP_TOM70OE_old	24

## Sheet: Figure 5—figure supplement 1
Figure 5—figure supplement 1A				Figure 5—figure supplement 1B
samples	sample size			samples	sample size
Atp25GFP_wt_young	36			wt_young_TMRM	156
Atp25GFP_wt_old	53			wt_old_TMRM	22
Atp25GFP_pZ3EV-TOM70_young	63			z3Tom70_young_TMRM	62
Atp25GFP_pZ3EV-TOM70_old	65			z3Tom70_old_TMRM	31
Leu9GFP_wt_young	128
Leu9GFP_wt_old	57
Leu9GFP_pZ3EV-TOM70_young	48
Leu9GFP_pZ3EV-TOM70_old	42
Tom20GFP_wt_young	82
Tom20GFP_wt_old	36
Tom20GFP_pZ3EV-TOM70_young	95
Tom20GFP_pZ3EV-TOM70_old	78
Yfh1GFP_wt_young	64
Yfh1GFP_wt_old	63
Yfh1GFP_pZ3EV-TOM70_young	103
Yfh1GFP_pZ3EV-TOM70_old	65

## Sheet: Figure 7A
strain	sample size
WT_young	401
WT_old	41
GCN4OE_young	137
GCN4OE_old	49
GIS1OE_young	146
GIS1OE_old	49
FKH2OE_young	203
FKH2OE_old	53
FKH1OE_young	163
FKH1OE_old	61
HSF1OE_young	145
HSF1OE_old	57
RTG3OE_young	159
RTG3OE_old	51
HAP4OE_young	75
HAP4OE_old	65

## Sheet: Figure 2-figure supplement1
strain	sample size
CCP1	184
CCP1; TOM70 OE	287
CCP1; TOM70 OE; NAC	406
Cox5A0	290
Cox5A; TOM70 OE	312
Cox5A; TOM70 OE; NAC	255
Leu90	263
Leu9; TOM70 OE	289
Leu9; TOM70 OE; NAC	316
QCR70	240
QCR7; TOM70 OE	155
QCR7; TOM70 OE; NAC	316
Tim440	272
Tim44; TOM70 OE	273
Tim44; TOM70 OE; NAC	273
Tom220	174
Tom22; TOM70 OE	338
Tom22; TOM70 OE; NAC	348

[truncated: 4 more sheets: Figure 3-figure supplement1B, Figure 3-figure supplement1C, Figure 7-figure supplement1A, Figure 7-figure supplement1C]
