# Supplementary material for: Tom70-based transcriptional regulation of mitochondrial biogenesis and aging
Source: eLife. 2022 Mar 2;11:e75658. doi: 10.7554/eLife.75658 (PMC8926401; doi:10.7554/eLife.75658)
Supplement: Supplementary file 5. [file elife-75658-supp5.xlsx]

## Sheet: qPCR primers
REAGENT or RESOURCE	SOURCE	IDENTIFIER
K3451_ZIM17_F	this study	TCCAATCACCACCTGATCGC		CG12379
K3452_ZIM17_R	this study	TCGGCAAAAACTCGCAGTTG
K3453_ZIM17_F	this study	ACTCGATGCGTGCCATTTCA		CG8206
K3454_ZIM17_R	this study	GGCGACAGAGAGCCATTCG
K3455_Tim16_F	this study	GACCCCAAAAACGTGGACG		CG5268
K3456_Tim16_R	this study	TGACTGGATATAGAAGGAGCCG
K3457_Tim16_F	this study	CAGGAAACGCTAAAGGCCAAC		CG1409
K3458_Tim16_R	this study	GGTAAGGTCACTCACATCGAGAA
K3459_Tim44_F	this study	CTGGAGGACGCCAGCAAAT		CG11779
K3460_Tim44_R	this study	CGTCGTCGTGTTAGAGATAGCC
K3461_PUT2_F	this study	TCAGGAGATTCAGCACAGGC		CG6661
K3462_PUT2_R	this study	ACGTGAGCCAAGTTCGTCTG
K3463_PUT2_F	this study	GGGTTCCGTTATACCGGACC		CG7145
K3464_PUT2_R	this study	CCTTACGCTCCTTAGAGTCCTTG
K3465_QCR7_F	this study	CATCATGAGGGCCCTCCATC		CG3560
K3466_QCR7_R	this study	TTTTCCCAGTCCTCACGCTC
K3467_QCR7_F	this study	AGCGGTTTTCTCCAAGTTGGG		CG17856
K3468_QCR7_R	this study	TCTCGTACAGACAGTCATCGC
K3469_YTA10_F	this study	AACAAGAAGTGGGTGAGAGTGC		CG6512
K3470_YTA10_R	this study	GACACTGCCGATGTTGAACC
K3471_TIM23_F	this study	CATTAGGTACATTGACGGTGCT		CG40042
K3472_TIM23_R	this study	AGCCCGCAATTACTGTGTTTA
K3473_TIM50_F	this study	GACTCCGTGTGAACCTCAGC		CG12313
K3474_TIM50_R	this study	GGTTTGTGGAAAGAGCTTCGTTA
K3475_TIM50_F	this study	TGTGTTGGGGAGTCTCTTCAG		CG6691
K3476_TIM50_R	this study	GACCCCGATGGTCTTCCTC
K3477_COX5A_F	this study	AAGGAGCAGGGAGACTGGAAG		CG10664
K3478_COX5A_R	this study	CCTGGACCTCGGCGATAGT
K3479_COX5A_F	this study	GCCAGTGGAGGAGATGGTATT		CG10396
K3480_COX5A_R	this study	ACTATCGAAGTATATGGGTCGCC
K3481_PSD1_F	this study	AACAACAACCGAATCCTAGTCAG		CG5991
K3482_PSD1_R	this study	GCGCCAAACACACAGATGC
K3483_ATP1_F	this study	GTCTACGGTCTGAACAACATCC		CG3612
K3484_ATP1_R	this study	GGCTCCAAGTTAAGGGCCAT
K3485_ATP2_F	this study	TCCCTTTGGGATGACAAGGAT		CG5389
K3486_ATP2_R	this study	GTCCGTCTTGCAGACTTCCTG
K3487_ATP2_F	this study	AGATTGTGGCCGTAATTGGTG		CG11154
K3488_ATP2_R	this study	CGAGGAGAACGGTTGTCTACTTC
K3489_ACO1_F	this study	TCCCATTTGGATCAACCGGAT		CG4706
K3490_ACO1_R	this study	GACGGTGGATGGAACTGCTA
K3491_ACO1_F	this study	AGTGGCTCTGTCCAAGTTCG		CG9244
K3492_ACO1_R	this study	GAGTCAGTGGGCGGTTCAAG
K3493_MDL1_F	this study	CCGCCGAACCGTTACCATAG		CG3156
K3494_MDL1_R	this study	GCTCTGTGCAAATCCACGTC
K3495_CIT1_F	this study	TGCCAAATGTGGGAGCCTATG		CG3861
K3496_CIT1_R	this study	ATGCTGCTTGCGGAAGTTCTT
K3497_YFH1_F	this study	ATGTTTGCCGGTCGTTTGATG		CG8971
K3498_YFH1_R	this study	GGGCAGGATCACTTGGCTG
K3499_TOM7_F	this study	TCCGAGGGAGTTAAGGATCGT		CG8226
K3500_TOM7_R	this study	GCACGAATCCCCAGTGGAAT
K3501_TOM20_F	this study	AGGTGCTGCAATCCTCCCT		CG7654
K3502_TOM20_R	this study	GTCGATACTTGCGTTTCCAGAT
K3503_TOM20_F	this study	GAGTTCCCAATCTGAACGAC
K3504_TOM20_R	this study	CGCCACTCTCGAAATCTCCG
K3505_TOM40_F	this study	ACGACCGACTATCGCGGTA		CG12157
K3506_TOM40_R	this study	GCCGGAGTTGGTGAATATGC
K3507_TOM40_F	this study	CCATCAACATGAGCAATGTGGT
K3508_TOM40_R	this study	CGCGATAGTCGGTCGTCAG
K3509_TOM70_F	this study	CGGAGGGTAACAACTGCTACA		CG6756
K3510_TOM70_R	this study	GACGTTGGACCACTTCTTGAG
K3511_TOM70_F	this study	ATGGCGATGACTCTGAACATTG
K3512_TOM70_R	this study	CCAGGGGAGTTCCAAGGATG
K3513_tubulin_F	this study	CGGTCAATGCGGTAACCAGAT		CG9359
K3514_tubulin_R	this study	ACTATCGCCGTAGTACGTTCC
K3515_tubulin_F	this study	CAAGGCTTCCAACTCACACAC		CG9277
K3516_tubulin_R	this study	GACGGCACAACCGAGTATG
